# Supplementary material for: Increased expression of Drosophila Sir 2 extends life span in a dose-dependent manner
Source: PubMed Central journal article supplement (PMC3808700; doi:10.18632/aging.100599), 2013-09-07
Supplement: aging-05-682-s001.pdf [file aging-05-682-s001.pdf]

disease: selectivity, synergy and modulation of protein solubility in *Drosophila*. *Hum Mol Genet*. 2000; 9:2811-2820.

12. Griswold AJ, Chang KT, Runko AP, Knight MA, & Min KT. Sir2 mediates apoptosis through JNK-dependent pathways in *Drosophila*. *Proc Natl Acad Sci USA*. 2008; 105:8673-8678.

13. Astrom SU, Cline TW, and Rine J. The *Drosophila melanogaster sir2(+)* Gene Is Nonessential and Has Only Minor Effects on Position-Effect Variegation. *Genetics*. 2003; 163:931-937.

14. Holmes SG, Rose AB, Steuerle K, Saez E, Sayegh S, Lee YM, Broach JR. Hyperactivation of the silencing proteins, Sir2p and Sir3p, causes chromosome loss. *Genetics*. 1997; 145:605-14.

15. Kramer JM and Staveley BE. GAL4 causes developmental defects and apoptosis when expressed in the developing eye of *Drosophila melanogaster*. *Genet Mol Res*. 2003; 2:43-47.

## SUPPLEMENTARY FIGURES

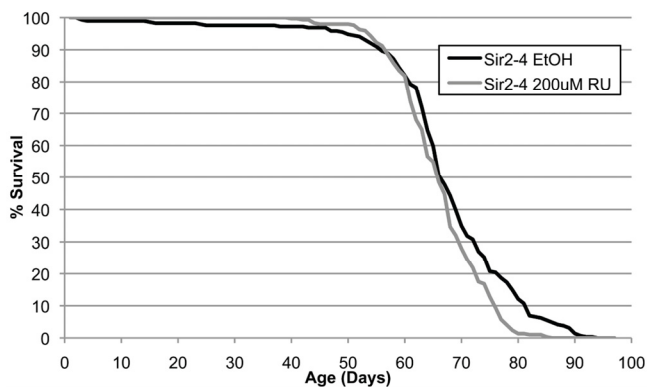

## SUPPLEMENTARY TABLES

Please browse full text version to see the Supplementary tables of this manuscript.

**Supplementary Figure 1.** Life span is not extended in Tubulin-Gene Switch>Sir2-4 flies in the presence of RU-486. The induction of Sir2 in this condition did not extend life span, indicating that the level of dSir2 expression was not able to extend life span.

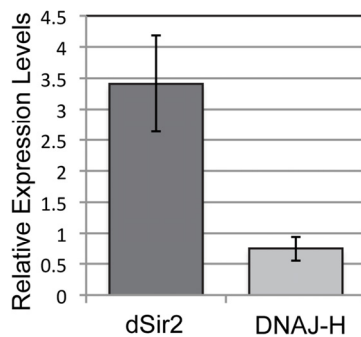

**Supplementary Figure 2.** *dnaJ-H* levels are not increased in ELAV-Gal4>dSir2<sup>EP2300</sup> flies over-expressing *dSir2* from the endogenous *dSir2* locus. While dSir2 is over 3-fold elevated in dSir2<sup>EP2300</sup> flies (dark grey bar represents *dSir2* levels as measured by qPCR,  $p < 0.0001$ ), *dnaJ-H* levels do not change (light grey bar represents *dnaJ-H* levels as measured by qPCR,  $p = 0.34$ ). Error bars represent SD of 3 biological replicates.

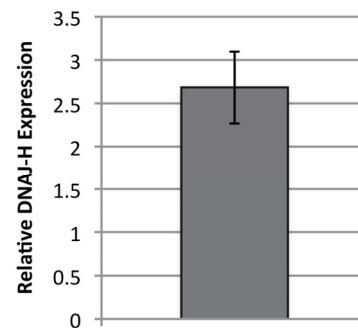

**Supplementary Figure 3.** When UAS-GFP is expressed using the strong, ubiquitous Daughterless-Gal4 driver, *dnaJ-H* levels are increased ( $p = 0.0021$ ). Error bars represent SD of 3 biological replicates.
